# Supplementary material for: Synthesis and characterization of novel electrochromic devices derived from redox-active polyamide–TiO2 hybrids
Source: Royal Society of Chemistry journal article supplement (doi:10.1039/c8tc04469d), 2018-01-01
Supplement: c8tc04469d1.pdf [file c8tc04469d1.pdf]

## Supporting Information

### Synthesis and Characterization of Novel Electrochromic Devices Derived from Redox-active Polyamide-TiO<sub>2</sub> Hybrids

By Bo-Cheng Pan<sup>a</sup>, Wei-Hao Chen<sup>a</sup>, Tzong-Ming Lee<sup>b</sup>, and Guey-Sheng Liou<sup>\*a,c</sup>

- a. Institute of Polymer Science and Engineering, National Taiwan University, 1 Roosevelt Road, 4th Sec., Taipei 10617, Taiwan. E-mail: [gслиou@ntu.edu.tw](mailto:gслиou@ntu.edu.tw); Tel: +886-2-33665070
- b. Material and Chemical Research Laboratories, Industrial Technology Research Institute, 195 Chung Hsing Road, 4th Sec., Hsinchu 31040, Taiwan
- c. Advanced Research Center for Green Materials Science and Technology, National Taiwan University, Taipei 10617, Taiwan.

#### List of Contents for Supplementary Information:

---

|                                                                                                                                                                                                                                                                                                                                            |             |
|--------------------------------------------------------------------------------------------------------------------------------------------------------------------------------------------------------------------------------------------------------------------------------------------------------------------------------------------|-------------|
| <b>Experimental section</b> .....                                                                                                                                                                                                                                                                                                          | <u>SI-3</u> |
| <b>Characterization</b> .....                                                                                                                                                                                                                                                                                                              | <u>SI-4</u> |
| <b>Figure S1</b> (a) TGA traces of the polyamides with a heating rate of 20 °C/min under nitrogen and air. (b) DSC trace of polyamides with a heating rate of 20 °C/min in nitrogen.....                                                                                                                                                   | <u>SI-5</u> |
| <b>Figure S2</b> TGA traces of TPPA-PA/TiO <sub>2</sub> and TPB-PA/TiO <sub>2</sub> hybrid materials in air.....                                                                                                                                                                                                                           | <u>SI-6</u> |
| <b>Figure S3</b> Cyclic voltammetric diagrams of (a) <b>TPPA-OH</b> and <b>TPPA-PA</b> hybrid films (b) <b>TPB-OH</b> and <b>TPB-PA</b> hybrid films on the ITO-coated glass substrate (thickness: 300 ± 50 nm; area: 25 mm × 6 mm) in 0.1 M TBABF <sub>4</sub> /PC at scan rate of 50 mVs <sup>-1</sup> .....                             | <u>SI-7</u> |
| <b>Figure S4</b> Partial magnification cyclic voltammetric diagrams of the devices derived from (a) <b>TPPA-OH</b> and <b>TPPA-PA</b> hybrid films, (b) <b>TPB-OH</b> and <b>TPB-PA</b> hybrid films on the ITO-coated glass substrate (thickness: 300 ± 50 nm; coated area: 2 cm x 2 cm) in 0.1 M TBABF <sub>4</sub> /PC electrolyte..... | <u>SI-8</u> |
| <b>Figure S5</b> Cyclic voltammetric diagrams of the ECDs derived from (a) <b>TPPA-OH</b> and (b) <b>TPB-OH</b> on the ITO-coated glass substrate (thickness: 300 ± 50 nm, coated area: 2 cm x 2                                                                                                                                           |             |

|                                                                                                                                                                                                                                                                                                                                                                                                                                                                                                                                               |              |
|-----------------------------------------------------------------------------------------------------------------------------------------------------------------------------------------------------------------------------------------------------------------------------------------------------------------------------------------------------------------------------------------------------------------------------------------------------------------------------------------------------------------------------------------------|--------------|
| cm) in 0.1 M TBABF <sub>4</sub> /PC electrolyte; (c) <b>TPPA-OH</b> and (d) <b>TPB-OH</b> in 0.1 M TBABF <sub>4</sub> /PC electrolyte with 0.015 M HV(BF <sub>4</sub> ) <sub>2</sub> .....                                                                                                                                                                                                                                                                                                                                                    | <u>SI-9</u>  |
| <b>Figure S6</b> Electrochromic behavior of (a) <b>TPPA-OH</b> and (b) <b>TPB-OH</b> thin films on the ITO-coated glass substrate (coated area: 25 mm × 6 mm, thickness: 300 ± 50 nm) in 0.1 M TBABF <sub>4</sub> /PC at the related applied potentials.....                                                                                                                                                                                                                                                                                  | <u>SI-10</u> |
| <b>Figure S7</b> Electrochromic behavior of the devices derived from (a) TPPA-OH, (b) TPPA-OH/HV, (c) TPB-OH, and (d) TPB-OH/HV.....                                                                                                                                                                                                                                                                                                                                                                                                          | <u>SI-11</u> |
| <b>Figure S8</b> Electrochromic device switching of (a) 1.05 V to -1.1 V TPPA-PATi5 (b) 1.02 V to -1.1 V TPPA-PATi10 at 435 nm (thickness: 300 ± 50 nm) on the ITO-coated glass substrate (coated area: 2 cm x 2 cm) in 0.1 M TBABF <sub>4</sub> /PC electrolyte with 0.015 M HV(BF <sub>4</sub> ) <sub>2</sub> .....                                                                                                                                                                                                                         | <u>SI-12</u> |
| <b>Figure S9</b> Electrochromic device of TPPA-PATi20 switching between 1.00 and -1.05 V at 430 nm (thickness: 300 ± 50 nm) on the ITO-coated glass substrate (coated area: 2cm x 2 cm) in 0.1 M TBABF <sub>4</sub> /PC electrolyte with 0.015 M HV(BF <sub>4</sub> ) <sub>2</sub> with a cycle time of 100 s for 300 cycles.....                                                                                                                                                                                                             | <u>SI-13</u> |
| <b>Figure S10</b> Electrochromic switch stability of (a), (b) ECD derived from blending of TPPA-OH and TPB-OH switching between 1.5 V to -1.6 V with cycle time 400 s for each cycle; (c),(d) ECD derived from blending of TPPA-PA and TPB-PA hybrid (20 wt% TiO <sub>2</sub> ) switching between 1.4 V to -1.5 V (thickness : 900 ± 100 nm on the ITO-coated glass substrate (coated area: 2 cm x 2 cm) in 0.1 M TBABF <sub>4</sub> /PC electrolyte with 0.015 M HV(BF <sub>4</sub> ) <sub>2</sub> with cycle time 200 s for each cycle..... | <u>SI-14</u> |
| <b>Table S1</b> Inherent Viscosity and Molecular Weights of the Polyamides.....                                                                                                                                                                                                                                                                                                                                                                                                                                                               | <u>SI-15</u> |
| <b>Table S2</b> Solubility behaviors of the polyamides.....                                                                                                                                                                                                                                                                                                                                                                                                                                                                                   | <u>SI-15</u> |
| <b>Table S3</b> Thermal properties of the polyamides.....                                                                                                                                                                                                                                                                                                                                                                                                                                                                                     | <u>SI-16</u> |
| <b>Table S4</b> Reaction composition of the <b>TPPA-PA</b> and <b>TPB-PA</b> hybrid films.....                                                                                                                                                                                                                                                                                                                                                                                                                                                | <u>SI-17</u> |
| <b>Table S5</b> Electrochemical response behavior of polyamide <b>TPPA-OH</b> and their hybrids at the first oxidation redox couples.....                                                                                                                                                                                                                                                                                                                                                                                                     | <u>SI-18</u> |
| <b>Table S6</b> Optical and electrochemical data collected for coloration efficiency measurements of <b>TPPA-PATi20/HV</b> ECD.....                                                                                                                                                                                                                                                                                                                                                                                                           | <u>SI-19</u> |

## Experimental section

### *Fabrication of electrochromic device (ECDs)*

The ITO-coated glasses used for EC devices washed by three steps, respectively detergent, acetone, and isopropanol each for 15 min by ultra-sonication. The films are prepared by coating onto the anode side ECD ITO-coated glass (25 mm × 30 mm × 1 mm, 5 Ω/ square). In the ECD cathode side ITO-coated glass were laminated with thermosetting plastics by a full-auto dispenser make the active areas of devices to be 20 mm × 20 mm and then covering to the another side. The EC device with gap of 120 μm is transferred to oven for 6 h at 120 °C. Only one tiny hole was left on one side of the devices for the later injection of the highly transparent polymer conductive gel. The gel is consist of poly(methyl methacrylate) (PMMA) (Mw: 120,000), tetrabutylammonium tetrafluoroborate (TBABF<sub>4</sub>), and propylene carbonate (PC). PMMA (275 mg) and TBABF<sub>4</sub> (66 mg; 0.1 M) was dissolved in PC (2 ml). The total amount of PC solution was around 0.048 ml inside the device after the injection. Finally, the devices were sealed completely by UV curable adhesive.

## Characterization

Fourier transform infrared (FT-IR) spectra were recorded on a PerkinElmer Spectrum 100 Model FT-IR spectrometer with resolution 1 cm<sup>-1</sup> and number of scans 32. The inherent viscosities were determined at 0.5 g/dL concentration using Tamson TV-2000 viscometer at 30 °C. Thermogravimetric analysis (TGA) conducted with a TA Instruments Q50, and experiments were carried out on approximately 3-7 mg film samples heated in flowing nitrogen or air (flow rate = 20 cm<sup>3</sup>/min) at a heating rate of 20 °C /min. DSC analyses were performed on a PerkinElmer Pyris 1 DSC at a scan rate of 20 °C /min in flowing nitrogen. Ultraviolet-visible (UV-vis) spectra of the obtained films were recorded on Hitachi U-4100 UV-vis-NIR spectrophotometer. The microstructure of the prepared PA hybrid films was inspected by using a JOEL JEM-1230 transmission electron microscope (TEM) at an operating voltage of 100 kV. Cyclic voltammetry (CV) was performed with a Bioanalytical System Model CV-27 and conducted with the use of a three-electrode cell in which ITO-coated glass (polymer films area about 25 mm x 6 mm) was used as the working electrode and a platinum wire as the auxiliary electrode at a scan rate of 50 mV s<sup>-1</sup> against a Ag/AgCl reference electrode in PC, using 0.1 M of TBABF<sub>4</sub> as the supporting electrolyte. All cell potentials were taken by using a homemade Ag/AgCl, KCl (3 M) reference electrode. The spectroelectrochemical cell was measured by using a two-electrode EC device (active area about 20 mm × 20 mm). Absorption spectra in spectroelectrochemical analysis were measured with a HP 8453 UV-Vis spectrophotometer. Coloration efficiency CE ( $\eta$ ) decides the amount of optical density change ( $\delta OD$ ) at a specific absorption wavelength induced as a function of the ejected/injected charge (Q; also termed as electro-activity) which is determined from the in situ experiments. CE is given by the equation:  $\eta = \delta OD / Q = \log [T_b / T_c] / Q$ , where  $\eta$  (cm<sup>2</sup> /C) is the coloration efficiency at a given wavelength, Q is the injected charge, and T<sub>b</sub> and T<sub>c</sub> are the bleached and colored transmittance values, respectively.

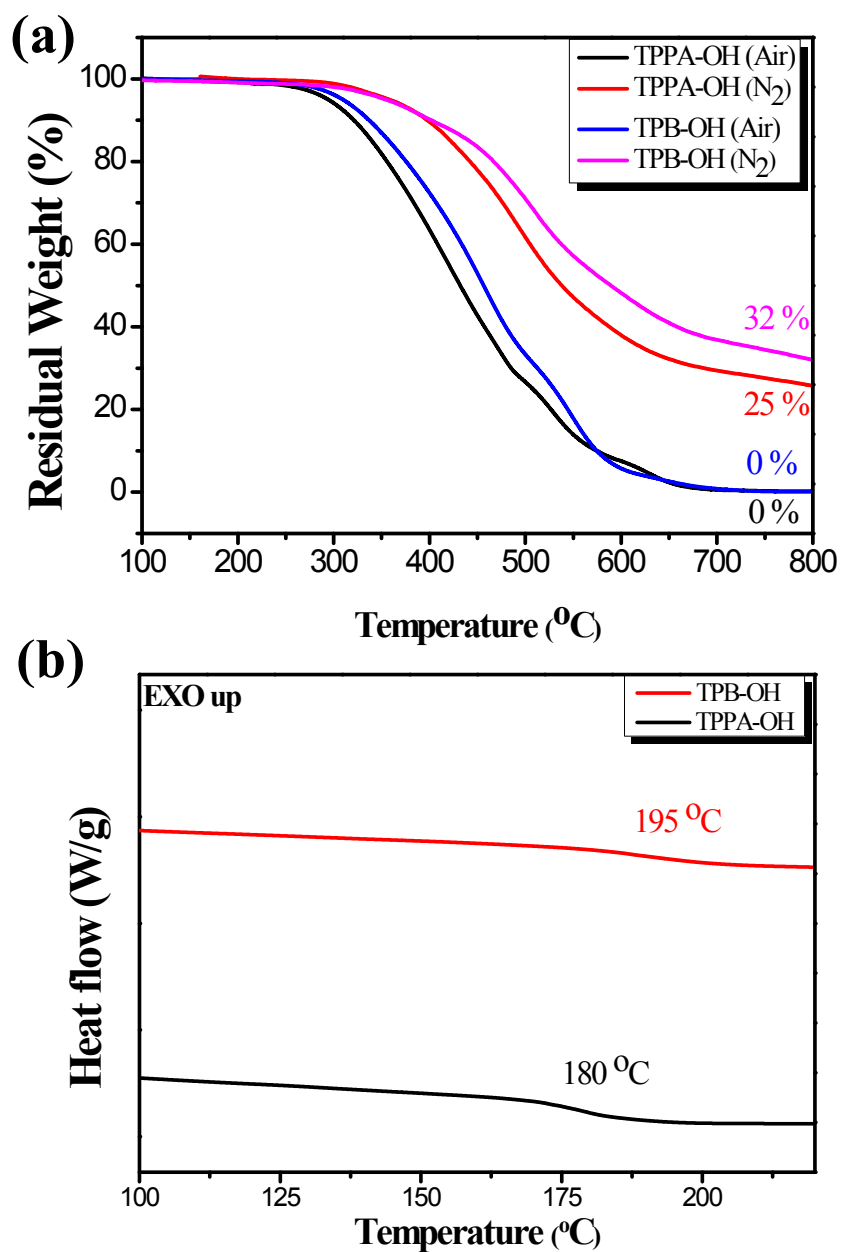

**Fig. S1** (a) TGA traces of the polyamides with a heating rate of 20 °C/min under nitrogen and air. (b) DSC trace of polyamides with a heating rate of 20 °C/min in nitrogen.

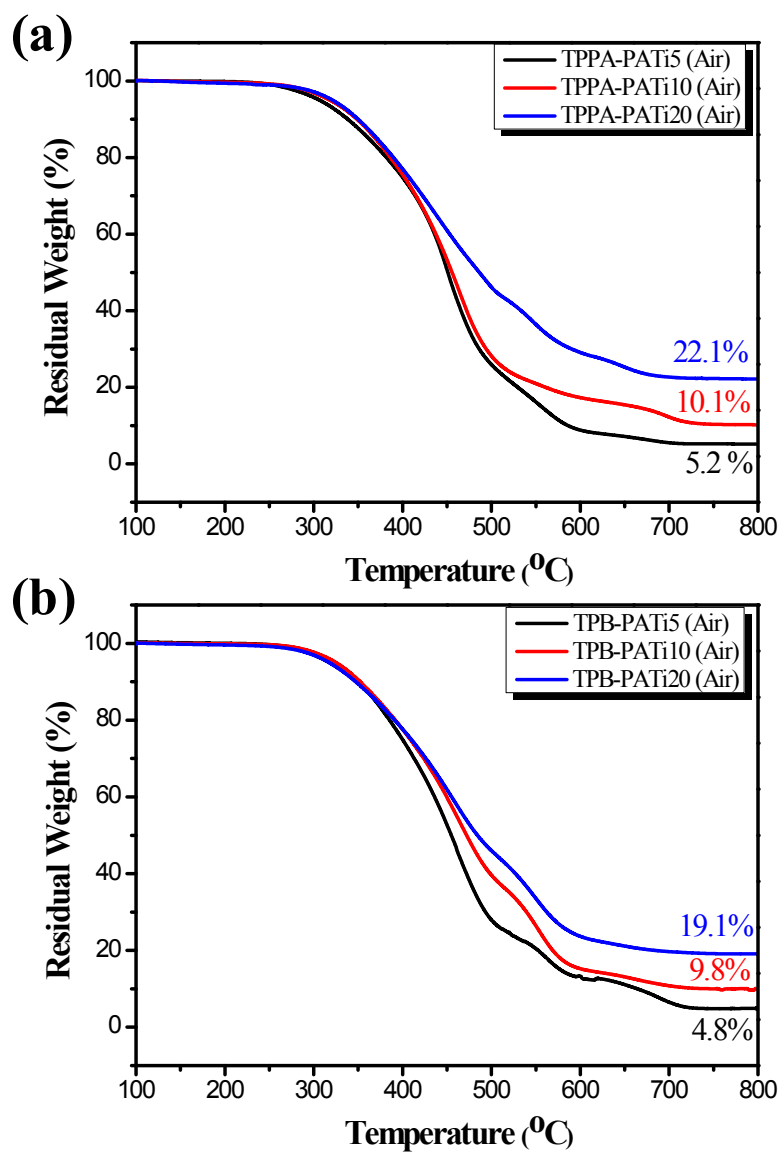

**Fig. S2** TGA traces of TPPA-PA/TiO<sub>2</sub> and TPB-PA/TiO<sub>2</sub> hybrid materials in air.

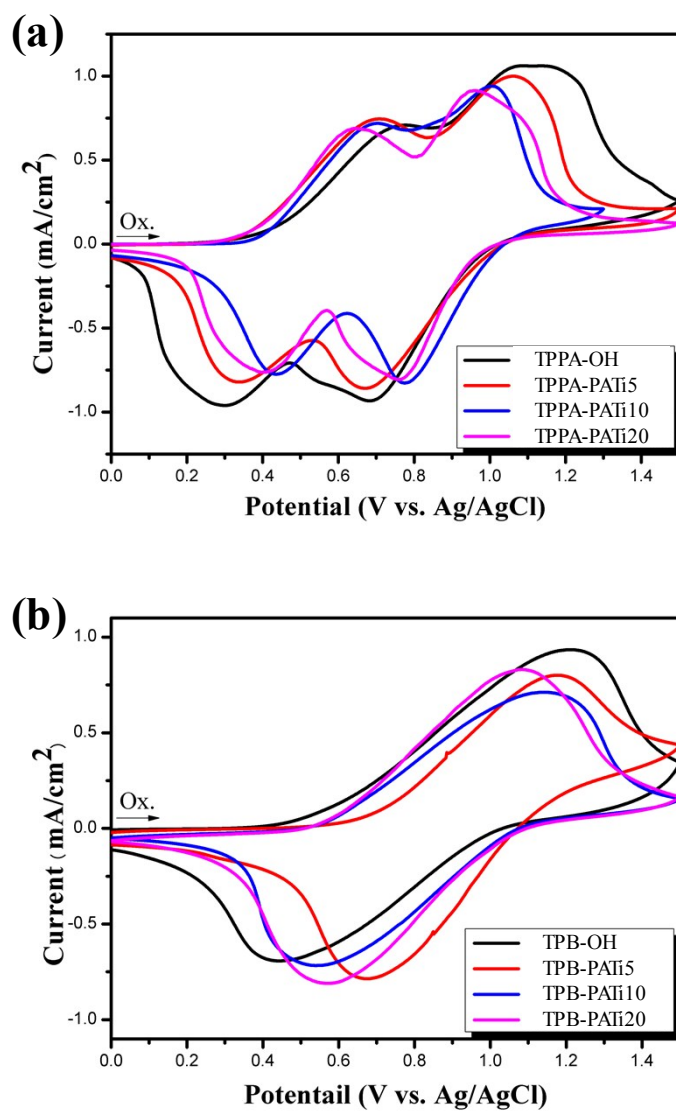

**Fig. S3** Cyclic voltammetric diagrams of (a) **TPPA-OH** and **TPPA-PA** hybrid films (b) **TPB-OH** and **TPB-PA** hybrid films on the ITO-coated glass substrate (thickness:  $300 \pm 50$  nm; coated area:  $25 \text{ mm} \times 6 \text{ mm}$ ) in 0.1 M TBABF<sub>4</sub>/PC at scan rate of  $50 \text{ mV s}^{-1}$ .

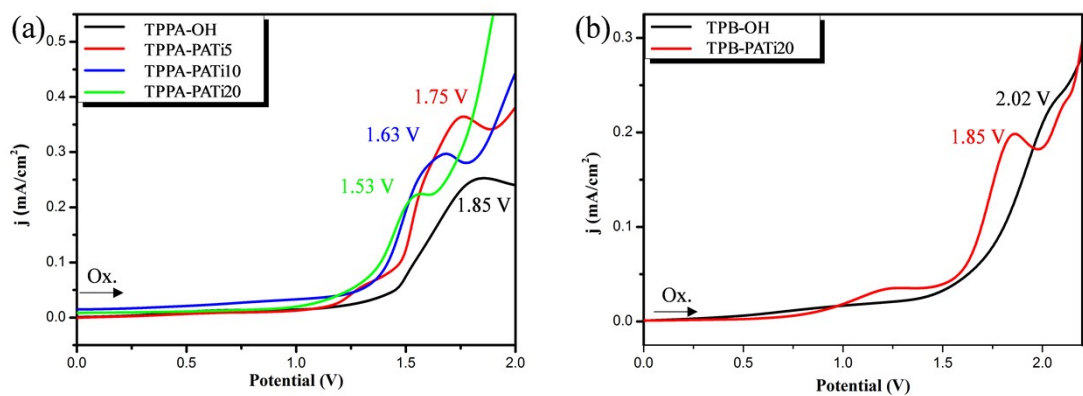

**Fig. S4** Partial magnification cyclic voltammetric diagrams of the devices derived from (a) **TPPA-OH** and **TPPA-PA** hybrid films, (b) **TPB-OH** and **TPB-PA** hybrid films on the ITO-coated glass substrate (thickness :  $300 \pm 50$  nm; coated area: 2 cm x 2 cm) in 0.1 M TBABF<sub>4</sub>/PC electrolyte.



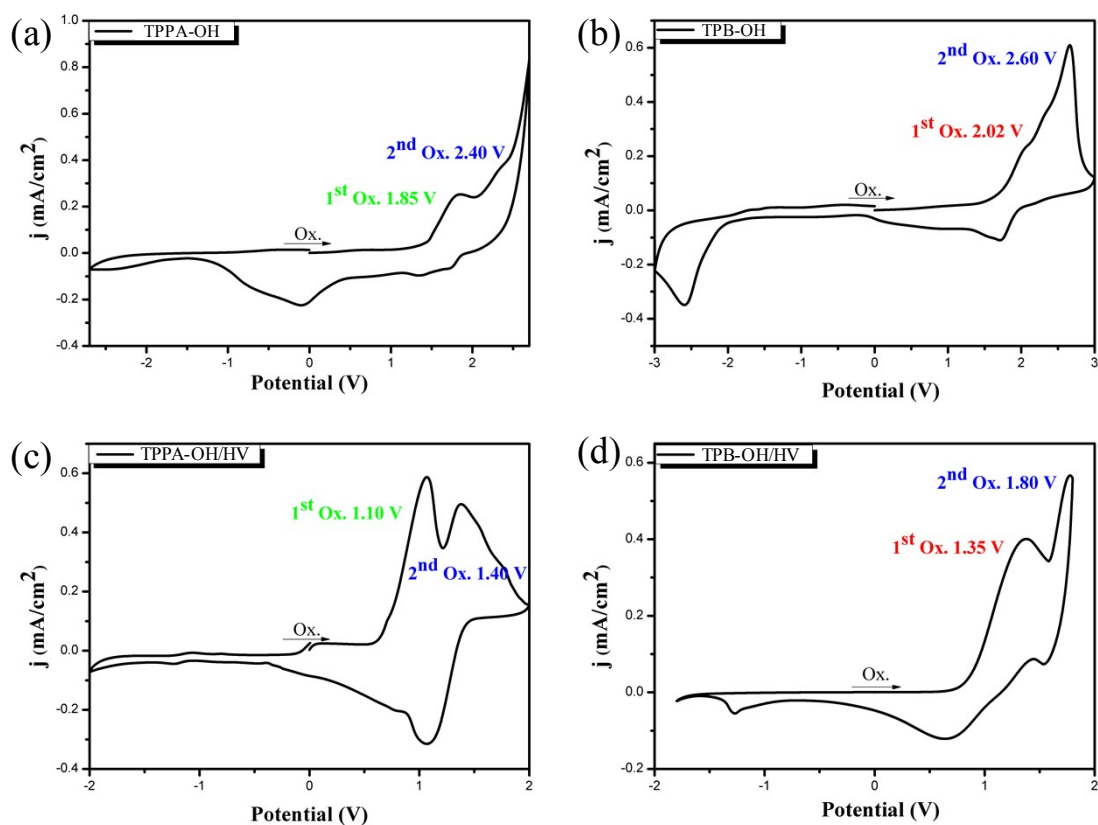

**Fig. S5** Cyclic voltammetric diagrams of the ECDs derived from (a) **TPPA-OH** and (b) **TPB-OH** on the ITO-coated glass substrate (thickness:  $300 \pm 50$  nm, coated area: 2 cm x 2 cm) in 0.1 M TBABF<sub>4</sub>/PC electrolyte; (c) **TPPA-OH** and (d) **TPB-OH** in 0.1 M TBABF<sub>4</sub>/PC electrolyte with 0.015 M HV(BF<sub>4</sub>)<sub>2</sub>.

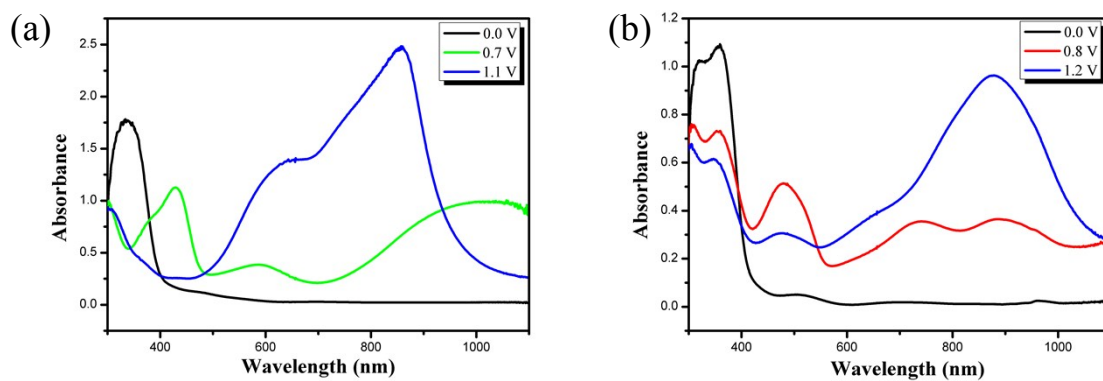

**Fig. S6** Spectroelectrochemical behavior of (a) **TPPA-OH** and (b) **TPB-OH** thin films on the ITO-coated glass substrate (coated area: 25 mm × 6 mm, thickness: 300 ± 50 nm) in 0.1 M TBABF<sub>4</sub>/PC at the related applied potentials.

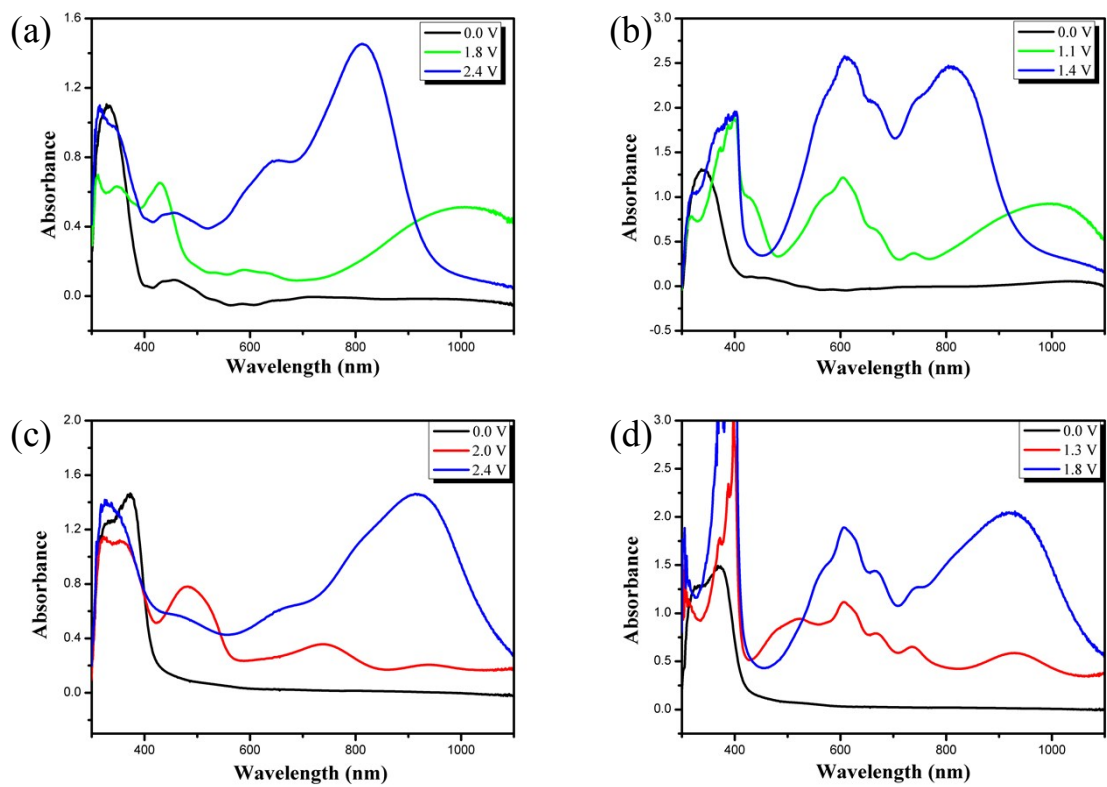

**Fig. S7** Electrochromic behavior of the ECDs derived from (a) TPPA-OH, (b) TPPA-OH/HV, (c) TPB-OH, and (d) TPB-OH/HV.

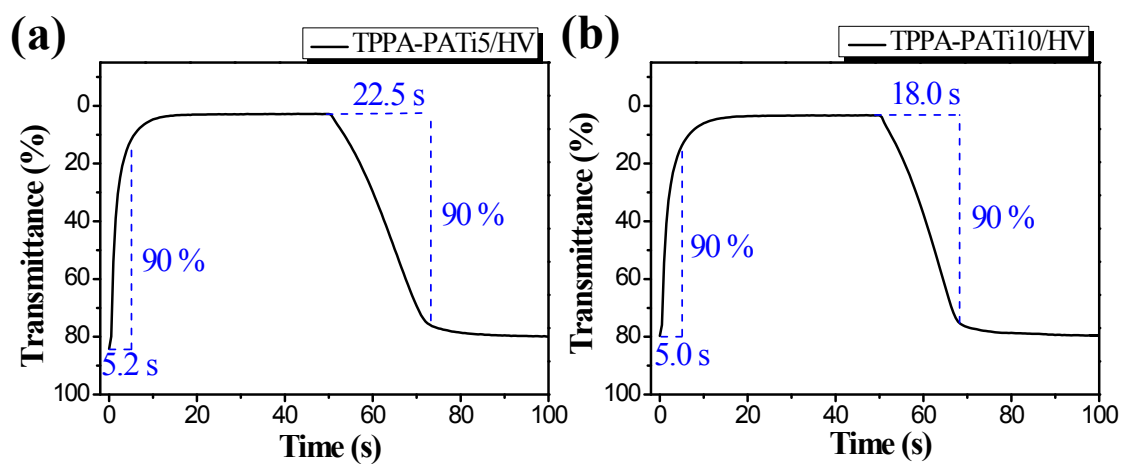

**Fig. S8** Electrochromic switching of devices (a) between 1.05 V to -1.1 V for **TPPA-PATi5** and (b) between 1.02 V to -1.1 V for **TPPA-PATi10** monitored at 435 nm (thickness:  $300 \pm 50$  nm) on the ITO-coated glass substrate (coated area: 2 cm x 2 cm) in 0.1 M TBABF<sub>4</sub>/PC electrolyte with 0.015 M HV(BF<sub>4</sub>)<sub>2</sub>.

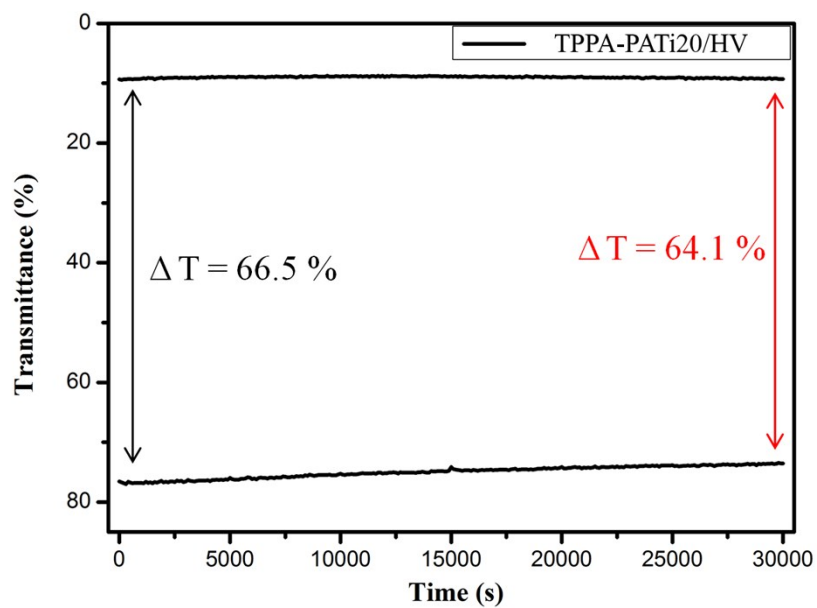

**Fig. S9** Electrochromic device of TPPA-PATi20 switching between 1.00 and -1.05 V at 430 nm (thickness:  $300 \pm 50$  nm) on the ITO-coated glass substrate (coated area: 2cm x 2 cm) in 0.1 M TBABF<sub>4</sub>/PC electrolyte with 0.015 M HV(BF<sub>4</sub>)<sub>2</sub> at a cycle time of 100 s for 300 cycles.

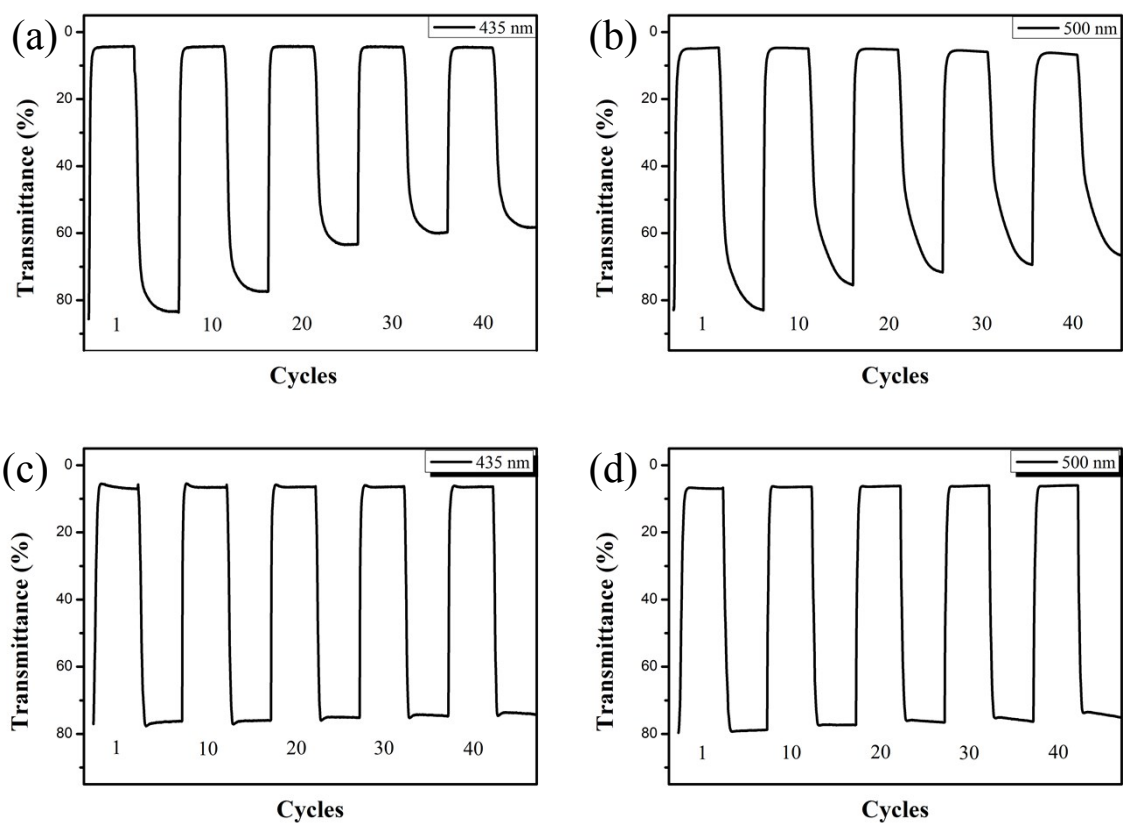

**Fig. S10** Electrochromic switch stability of ECDs (a) and (b) derived from blending of **TPPA-OH** and **TPB-OH** switching between 1.5 V to -1.6 V at cycle time 400 s for each cycle; (c) and (d) derived from blending of **TPPA-PA** and **TPB-PA** hybrid (20 wt%  $\text{TiO}_2$ ) switching between 1.4 V to -1.5 V (thickness :  $900 \pm 100$  nm on the ITO-coated glass substrate (coated area: 2 cm x 2 cm) in 0.1 M TBABF<sub>4</sub>/PC electrolyte with 0.015 M  $\text{HV}(\text{BF}_4)_2$  at cycle time 200 s for each cycle.

**Table S1** Inherent Viscosities and Molecular Weights of the Polyamides

| Code           | $\eta_{inh}$ (dL/g) <sup>a</sup> | $M_w$ <sup>b</sup> | $M_n$ <sup>b</sup> | PDI <sup>c</sup> |
|----------------|----------------------------------|--------------------|--------------------|------------------|
| <b>TPPA-OH</b> | 0.31                             | 18600              | 9800               | 1.90             |
| <b>TPB-OH</b>  | 0.26                             | 16100              | 8100               | 1.99             |

<sup>a</sup> Measured at a polymer concentration of 0.5 g dL<sup>-1</sup> in DMAc at 30 °C.

<sup>b</sup> Calibrated with polystyrene standards, using NMP as the eluent at a constant flow rate of 0.5 ml/min at 40 °C.

<sup>c</sup> Polydispersity Index ( $M_w/M_n$ ).

**Table S2** Solubility behaviors of the polyamides<sup>a</sup>

| Index          | Solubility in various Solvents |      |     |      |                  |     |                   |
|----------------|--------------------------------|------|-----|------|------------------|-----|-------------------|
|                | NMP                            | DMAc | DMF | DMSO | <i>m</i> -cresol | THF | CHCl <sub>3</sub> |
| <b>TPPA-OH</b> | ++                             | ++   | ++  | ++   | +-               | -   | -                 |
| <b>TPB-OH</b>  | ++                             | ++   | ++  | ++   | +-               | -   | -                 |

<sup>a</sup> Qualitative solubility was tested with 5 mg of a sample in 1 mL of solvent. ++, soluble at room temperature; +, soluble on heating; +-, partially soluble or swelling; -, insoluble even on heating.

**Table S3** Thermal properties of the polyamides<sup>a</sup>

| Polymer        | $T_g$ (°C) <sup>b</sup> | $T_d$ at 5 % weight loss (°C) <sup>c</sup> |     | $T_d$ at 10 % weight loss (°C) <sup>d</sup> |     | char yield (wt%) <sup>e</sup> |
|----------------|-------------------------|--------------------------------------------|-----|---------------------------------------------|-----|-------------------------------|
|                |                         | N <sub>2</sub>                             | Air | N <sub>2</sub>                              | Air |                               |
| <b>TPPA-OH</b> | 180                     | 350                                        | 300 | 400                                         | 320 | 32                            |
| <b>TPB-OH</b>  | 195                     | 350                                        | 320 | 400                                         | 340 | 25                            |

<sup>a</sup> The polymer film samples were heated at 200 °C for 1h prior to all the thermal analyses.

<sup>b</sup> Midpoint temperature of baseline shift on the second DSC heating trace (rate: 20 °C /min) of the sample after quenching from 300 °C to 50 °C (rate: 200 °C /min) in nitrogen.

<sup>c</sup> Temperature at which 5% weight loss recorded by TGA at a heating rate of 20 °C /min and a gas-flow rate of 20 cm<sup>3</sup>/min.

<sup>d</sup> Temperature at which 10% weight loss occurred.

<sup>e</sup> Residual weight percentage at 800 °C in nitrogen.



**Table S4** Reaction composition of the **TPPA-PA** and **TPB-PA** hybrid films

| index       | Reactant composition/wt% |                      | Hybrid film inorganic content/wt% |                           |
|-------------|--------------------------|----------------------|-----------------------------------|---------------------------|
|             | polymer                  | Ti(OBu) <sub>4</sub> | Theoretical                       | Experimental <sup>a</sup> |
| TPPA-OH     | 100                      | 0                    | 0                                 | 0                         |
| TPPA-PATi5  | 82.0                     | 18.0                 | 5                                 | 5.2                       |
| TPPA-PATi10 | 67.8                     | 32.2                 | 10                                | 10.1                      |
| TPPA-PATi20 | 48.8                     | 51.2                 | 20                                | 22.1                      |
| TPB-OH      | 100                      | 0                    | 0                                 | 0                         |
| TPB-PATi5   | 82.0                     | 18.0                 | 5                                 | 4.8                       |
| TPB-PATi10  | 67.8                     | 32.2                 | 10                                | 9.8                       |
| TPB-PATi20  | 48.8                     | 51.2                 | 20                                | 19.1                      |

<sup>a</sup> Experimental titania contents were estimated from TGA in air atmosphere.

**Table S5** Electrochemical response behavior of polyamide **TPPA-OH** and their hybrids at the first oxidation redox couples

|             | $\Delta E$ (V) <sup>a</sup> |           |           |           |            |
|-------------|-----------------------------|-----------|-----------|-----------|------------|
|             | 1 cycle                     | 100 cycle | 300 cycle | 500 cycle | 1000 cycle |
| TPPA-OH     | 0.40                        | 0.38      | 0.38      | 0.38      | 0.38       |
| TPPA-PATi5  | - <sup>b</sup>              | 0.27      | 0.30      | 0.27      | 0.27       |
| TPPA-PATi10 | - <sup>b</sup>              | 0.21      | 0.23      | 0.20      | 0.20       |
| TPPA-PATi20 | - <sup>b</sup>              | 0.21      | 0.20      | 0.19      | 0.17       |

<sup>a</sup>  $\Delta E = |E_{pa} - E_{pc}|$ ; <sup>b</sup> - : Not available.

**Table S6** Optical and electrochemical data collected for coloration efficiency measurements of TPPA-PATi20/HV ECD

| Cycling times <sup>a</sup> | $\Delta T^b$ | $\delta OD^c$ | Q<br>(mC/cm <sup>2</sup> ) <sup>d</sup> | $\eta$<br>(cm <sup>2</sup> /C) <sup>e</sup> | $\eta$ decay<br>(%) <sup>f</sup> | $\Delta T$ decay<br>(%) <sup>g</sup> |
|----------------------------|--------------|---------------|-----------------------------------------|---------------------------------------------|----------------------------------|--------------------------------------|
| <b>1</b>                   | 66.5         | 0.931         | 6.65                                    | 140.0                                       | 0                                | 0                                    |
| <b>100</b>                 | 66.4         | 0.916         | 6.58                                    | 139.2                                       | 0.57                             | 0.02                                 |
| <b>200</b>                 | 65.3         | 0.910         | 6.55                                    | 138.9                                       | 0.78                             | 1.80                                 |
| <b>300</b>                 | 64.1         | 0.892         | 6.49                                    | 137.4                                       | 1.85                             | 3.61                                 |

<sup>a</sup> Switching between 1.0 and -1.05 V

<sup>b</sup> Transmittance change at 435 nm.

<sup>c</sup> Optical density ( $\delta OD$ ) =  $\log[T_{\text{bleached}}/T_{\text{colored}}]$ , where  $T_{\text{colored}}$  and  $T_{\text{bleached}}$  are the maximum transmittance in the oxidized and neutral states, respectively.

<sup>d</sup> Ejected charge, determined from the in situ experiments.

<sup>e</sup> Coloration efficiency is derived from the equation  $\eta = \delta OD/Q$ .

<sup>f</sup> Decay of coloration efficiency after cyclic scans =  $(\eta_0 - \eta)/\eta_0 \times 100\%$ .

<sup>g</sup> Decay of transmittance after cyclic scans =  $(\Delta T_0 - \Delta T)/\Delta T_0 \times 100\%$ .
